# Supplementary material for: Syntheses, Transfection Efficacy and Cell Toxicity Properties of Novel Cholesterol-based Gemini Lipids having Hydroxyethyl Head group
Source: Royal Society of Chemistry journal article supplement (doi:10.1039/c0ob00940g), 2011-01-01
Supplement: c0ob00940g.pdf [file c0ob00940g.pdf]

## Supporting Information

# Syntheses, Transfection Efficacy and Cell Toxicity Properties of Novel Cholesterol-based Gemini Lipids having Hydroxyethyl Head group

Joydeep Biswas,<sup>a</sup> Santosh K. Mishra,<sup>a</sup> Paturu Kondaiah<sup>b</sup> and Santanu Bhattacharya<sup>\*,a,c</sup>

<sup>a</sup>Department of Organic Chemistry, Indian Institute of Science, Bangalore 560 012, India.

<sup>b</sup>Department of Molecular Reproduction, Development and Genetics, Indian Institute of Science,  
Bangalore 560 012, India.

<sup>c</sup>Chemical Biology Unit of JNCASR, Bangalore 560 064, India.

\*Corresponding author. Email: [sb@orgchem.iisc.ernet.in](mailto:sb@orgchem.iisc.ernet.in)

Phone: (91)-80-2293-2664; Fax: (91)-80-2360-0529.

| <b>Contents</b>                                          | <b>Page No.</b> |
|----------------------------------------------------------|-----------------|
| Elemental analysis values                                | S2              |
| Mass spectra of HG-5                                     | S3              |
| <sup>1</sup> H-NMR spectra of HG-5                       | S4              |
| EGFP-c3 DNA transfection efficacies in absence of serum  | S5              |
| EGFP-c3 DNA transfection efficacies in presence of serum | S6              |
| MTT based cellular cytotoxicity assay                    | S7              |
| Relationship between physicochemical parameters          | S8              |

**Table S1.** Elemental analysis values of new cholesterol based monomeric and gemini lipids.

| Lipid        | Formula                                 | Calculated |       |      | Found |       |      |
|--------------|-----------------------------------------|------------|-------|------|-------|-------|------|
|              |                                         | C          | H     | N    | C     | H     | N    |
| <b>H-M</b>   | $C_{33}H_{60}O_2NBr \cdot 0.5H_2O$      | 66.98      | 10.39 | 2.37 | 67.28 | 10.45 | 2.06 |
| <b>HG-3</b>  | $C_{67}H_{120}Br_2N_2O_4$               | 68.30      | 10.27 | 2.38 | 68.34 | 9.95  | 2.49 |
| <b>HG-4</b>  | $C_{68}H_{122}Br_2N_2O_4 \cdot 1.5H_2O$ | 67.03      | 10.34 | 2.30 | 66.87 | 10.41 | 2.21 |
| <b>HG-5</b>  | $C_{69}H_{124}Br_2N_2O_4 \cdot 2H_2O$   | 66.75      | 10.39 | 2.26 | 66.49 | 10.12 | 2.37 |
| <b>HG-6</b>  | $C_{70}H_{126}Br_2N_2O_4$               | 68.94      | 10.41 | 2.30 | 68.69 | 10.23 | 2.44 |
| <b>HG-12</b> | $C_{76}H_{138}Br_2N_2O_4$               | 70.02      | 10.67 | 2.15 | 69.82 | 10.43 | 2.36 |

Print of window 80: MS Spectrum

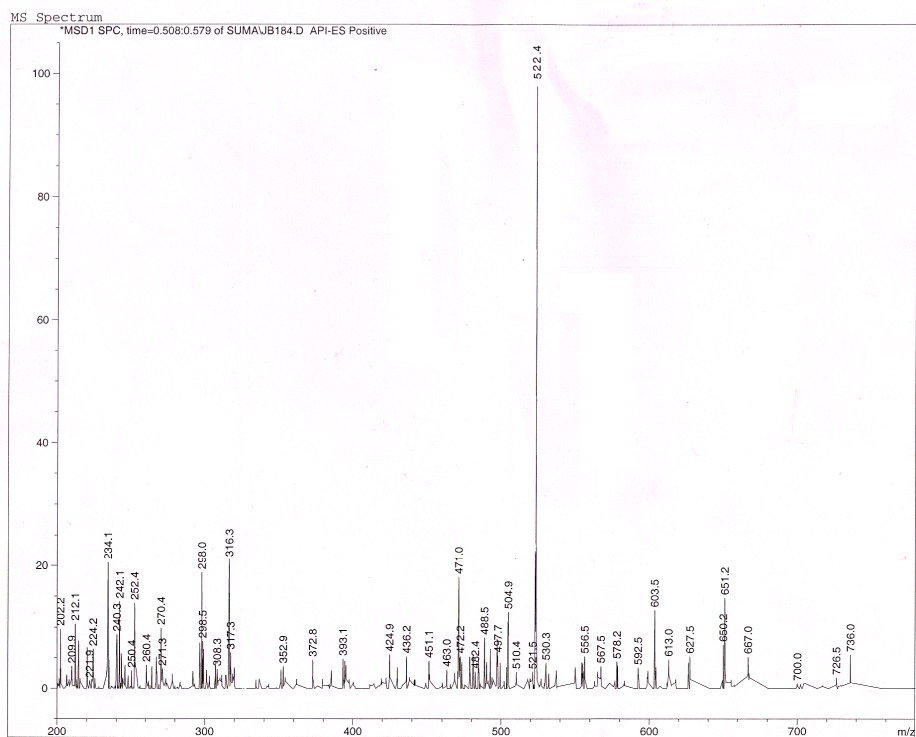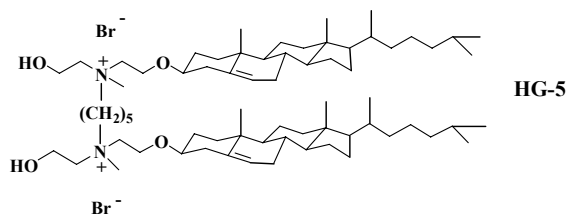

Figure S1. Mass spectra of HG-5.

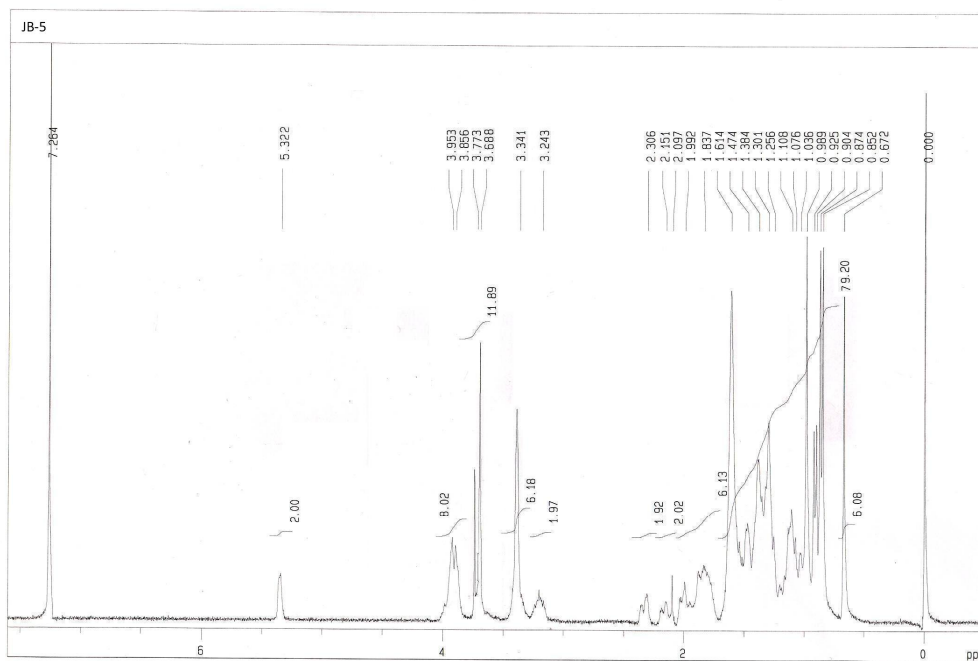

Figure S2. <sup>1</sup>H-NMR spectra of HG-5.

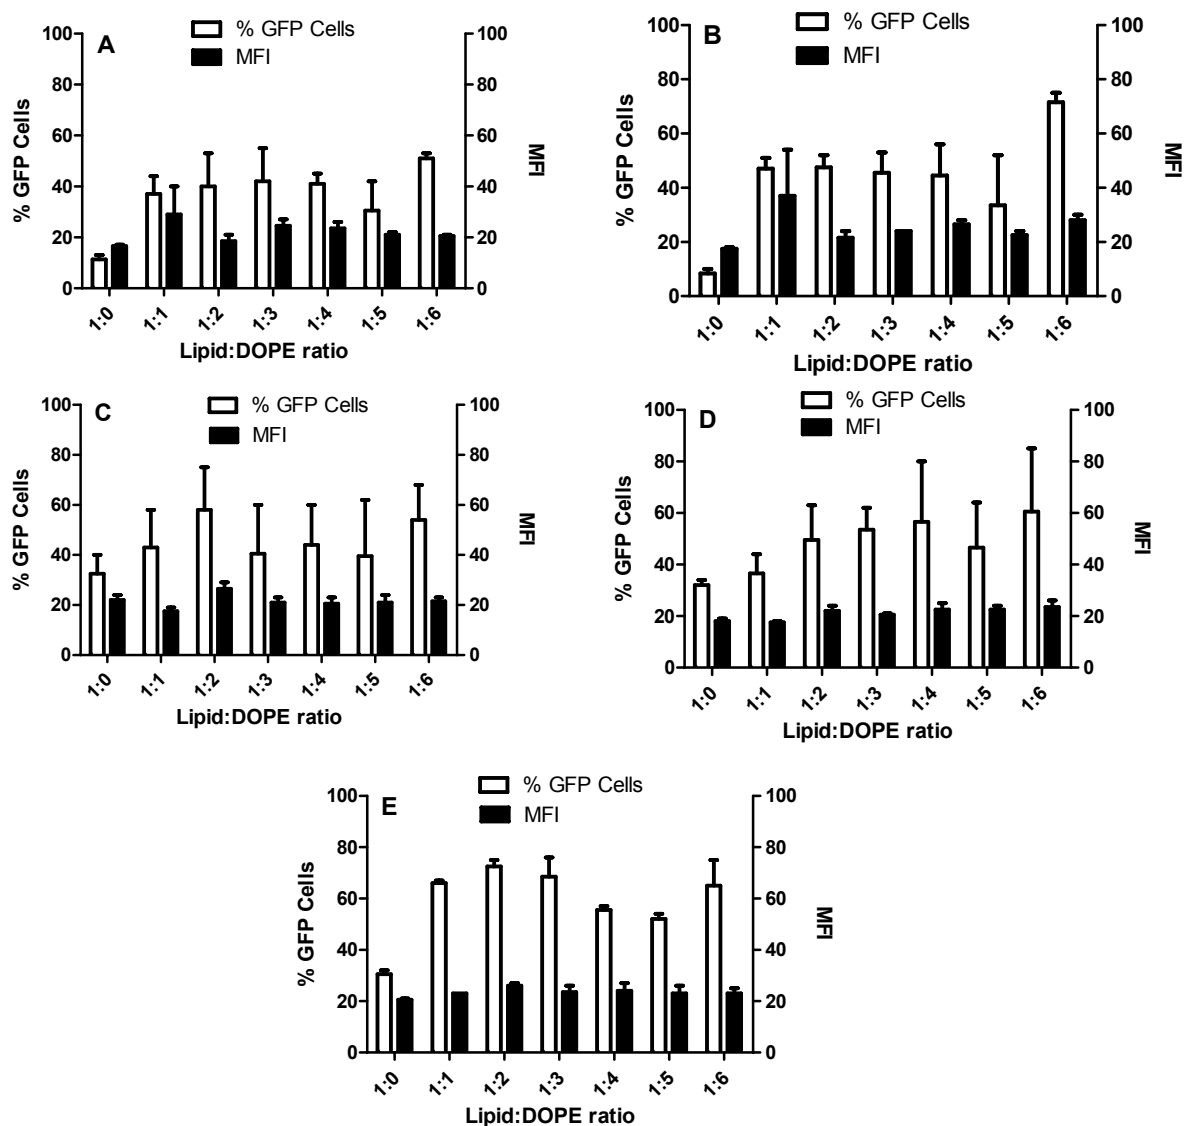

**Figure S3.** EGFP-c3 DNA transfection efficacies of cholesterol based gemini lipids mixed with various amount of DOPE in absence of serum. (A) HG-3; (B) HG-4; (C) HG-5; (D) HG-6 and (E) HG-12. Concentrations of DNA = 0.8  $\mu\text{g}/\text{well}$  and lipid were used at N/P ratio of 1. Data are expressed as the number of transfected cells and MFI is obtained from flow cytometry analysis after 48 h of transfection.

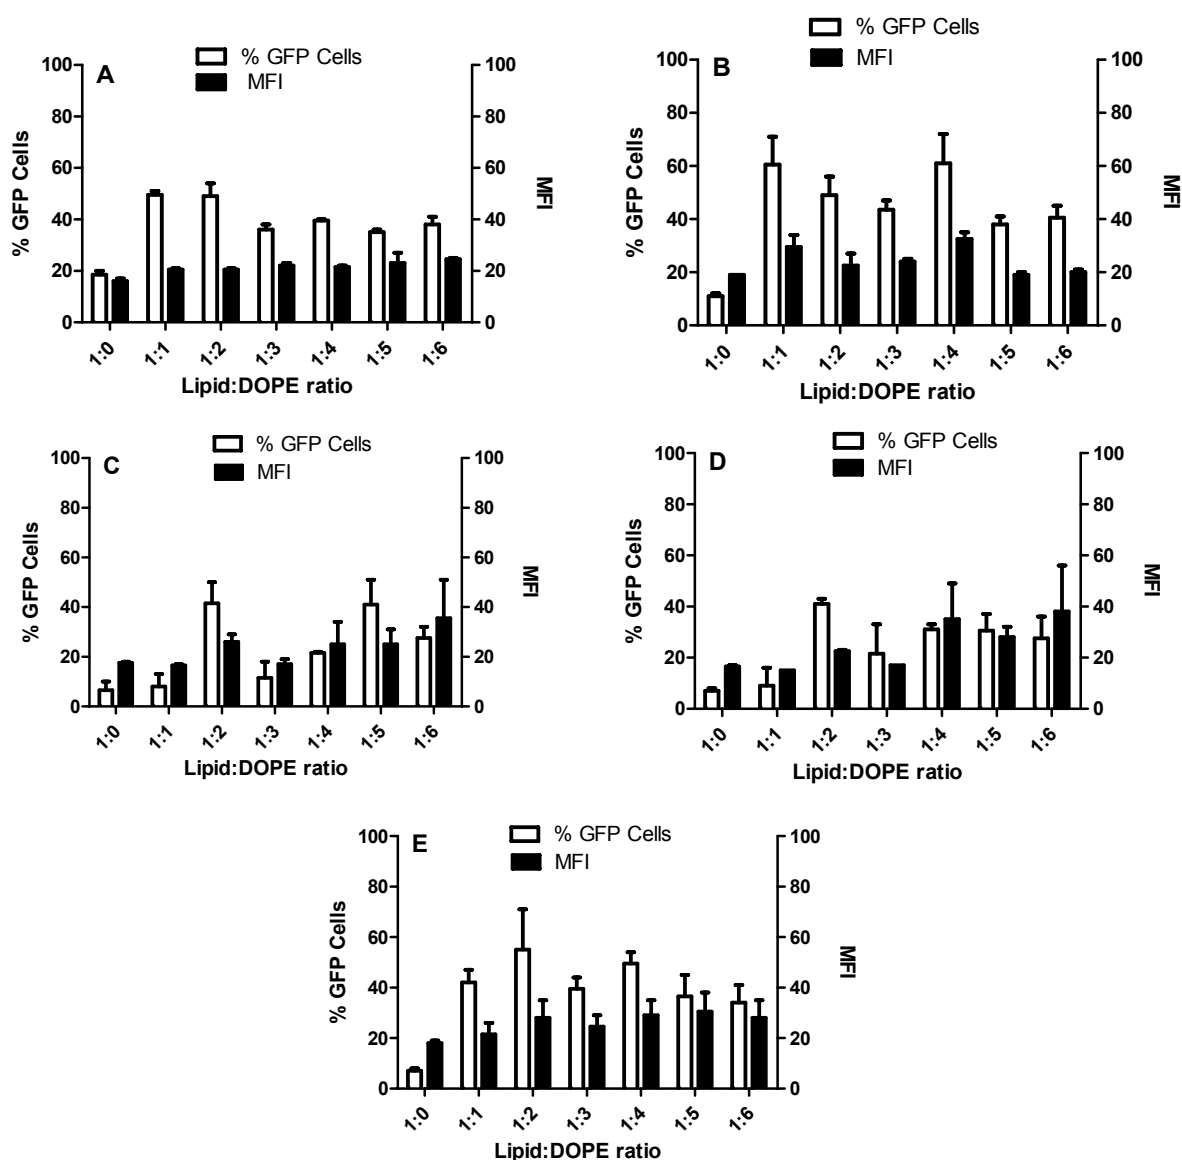

**Figure S4.** Transfection efficiencies of EGFP-c3 DNA of gemini lipids with various compositions of DOPE in presence of serum. (A) HG-3; (B) HG-4; (C) HG-5; (D) HG-6 and (E) HG-12. Concentrations of DNA = 0.8  $\mu\text{g}/\text{well}$  and lipid were used at N/P ratio of 1. Data are expressed as the number of transfected cells and MFI as obtained from the flow cytometry analysis.

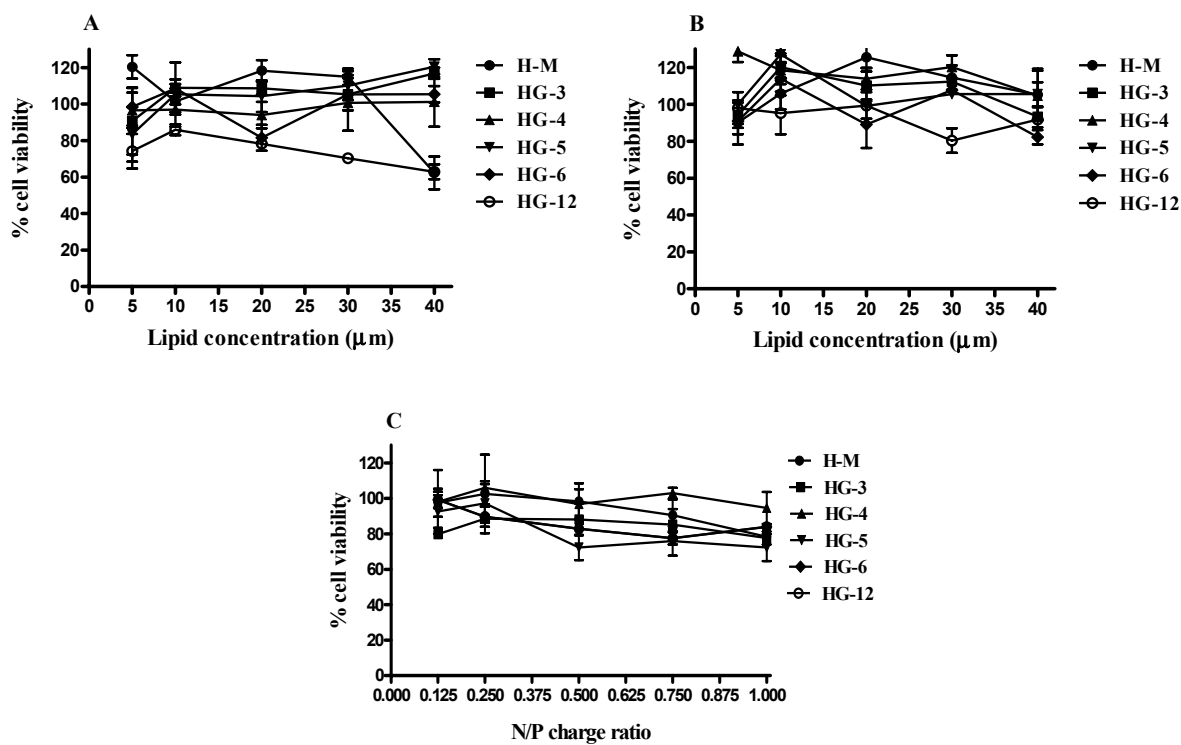

**Figure S5.** MTT based cellular cytotoxicity assay of gemini lipids against HeLa cells compared to that of monomeric lipid. Cytotoxicity of gemini lipids at high concentration (**A**) without serum; (**B**) in presence of serum and (**C**) cytotoxicity of gemini lipids at optimized lipid:DOPE molar ratio as a function of N/P charge ratio in presence of serum. The % viability values shown are the averages of triplicate experiments performed on the same day.

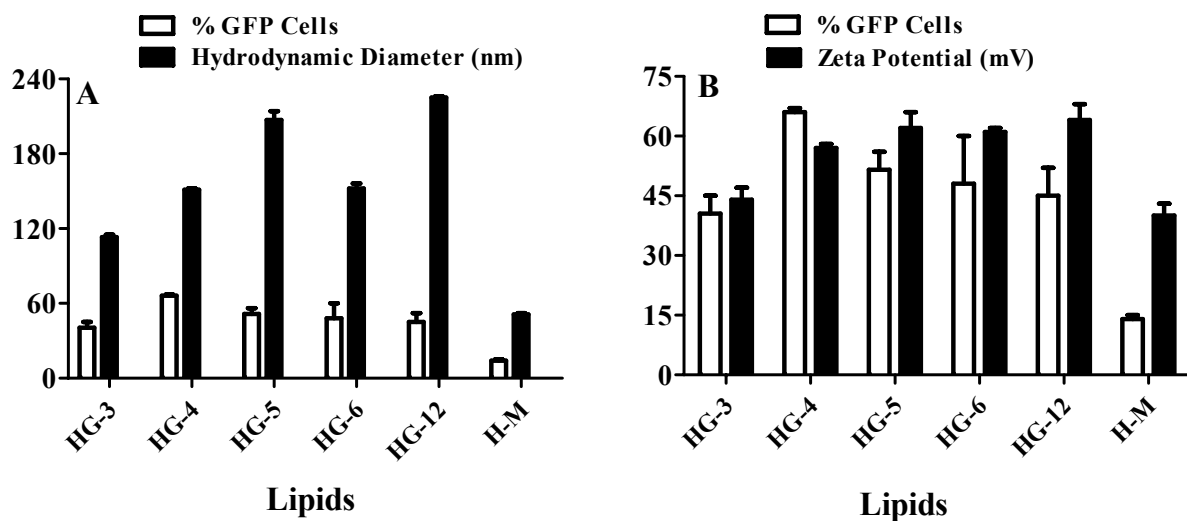

**Figure S6.** Relationship between physicochemical parameters *e.g.*, (A) hydrodynamic diameters and (B) zeta potential of various lipid suspensions.
